# Supplementary material
Source: MDPI journal article supplement (https://www.mdpi.com/1999-4907/12/2/246)
Supplement: s1 [file s1]

# Seasonal Stabilities of Soil Nematode Communities and Their Relationships with Environmental Factors in Different Temperate Forest Types on the Chinese Loess Plateau

Na Huo<sup>1</sup>, Shiwei Zhao<sup>1,2,3\*</sup>, Jinghua Huang<sup>2,3</sup>, Dezhou Geng<sup>1</sup>, Nan Wang<sup>1</sup>, Panpan Yang<sup>3</sup>

<sup>1</sup> College of Natural Resources and Environment, Northwest A&F University, Yangling 712100, China; huona@nwfau.edu.cn (N.H.); dzg2019@nwfau.edu.cn (D.G.); wang1996@nwfau.edu.cn (N.W.)

<sup>2</sup> State Key Laboratory of Soil Erosion and Dryland Farming on the Loess Plateau, Northwest A&F University, Yangling 712100, China, jhhuang@nwsuaf.edu.cn

<sup>3</sup> Institute of Soil and Water Conservation, Chinese Academy of Sciences and Ministry of Water Resources, Yangling 712100, China; yangpanpan19@mails.ucas.ac.cn

\* Correspondence: swzhao@nwfau.edu.cn

## Supplementary Material

**Table S1** Repeated measures ANOVA for the effects of forest type and sampling season on soil properties

| Soil properties                 | Forest type<br>(d.f.=2) | Season<br>(d.f.=1) | Forest type×Season<br>(d.f.=2) |
|---------------------------------|-------------------------|--------------------|--------------------------------|
| SBD                             | 0.25                    | 0.10               | 0.49                           |
| SMC                             | 24.98***                | 70.74***           | 2.48                           |
| pH                              | 0.90                    | 0.78               | 0.83                           |
| SOC                             | 18.36***                | 0.50               | 0.96                           |
| TN                              | 22.25***                | 0.15               | 0.60                           |
| MBC                             | 3.77                    | 22.22***           | 0.65                           |
| MBN                             | 5.26*                   | 2.78               | 8.56**                         |
| DOC                             | 69.22***                | 77.04***           | 4.56*                          |
| DON                             | 4.98*                   | 22.39***           | 0.42                           |
| NO <sub>3</sub> <sup>-</sup> -N | 11.91**                 | 25.72***           | 6.47*                          |
| NH <sub>4</sub> <sup>+</sup> -N | 6.33*                   | 46.04***           | 3.69                           |

Values are *F*-values for repeated measures ANOVA; d.f. is degree of freedom; \* *p* < 0.05; \*\* *p* < 0.01; \*\*\* *p* < 0.001. SBD, soil bulk density; SMC, soil moisture content; SOC, soil organic carbon; TN, soil total nitrogen; MBC, soil microbial biomass carbon; MBN, soil microbial biomass nitrogen; DOC, soil dissolved organic carbon; DON, soil dissolved organic nitrogen; NO<sub>3</sub><sup>-</sup>-N, soil nitrate nitrogen; and NH<sub>4</sub><sup>+</sup>-N, soil ammonium nitrogen.

**Table S2** Repeated measures ANOVA for the effects of forest type and sampling season on characteristics of soil nematode communities

| Nematode characteristics | Forest type<br>(d.f.=2) | Season<br>(d.f.=1) | Forest type×Season<br>(d.f.=2) |
|--------------------------|-------------------------|--------------------|--------------------------------|
| Total abundance          | 6.36**                  | 29.44***           | 0.35                           |
| Genus number             | 3.56                    | 0.04               | 0.82                           |
| PP abundance             | 4.88*                   | 1.15               | 2.33                           |
| BF abundance             | 4.75*                   | 12.54**            | 0.84                           |
| FF abundance             | 14.88***                | 35.21***           | 5.09*                          |
| OP abundance             | 0.17                    | 6.08*              | 2.11                           |
| $H'$                     | 25.52***                | 6.38*              | 3.03                           |
| $J'$                     | 15.93***                | 6.18*              | 5.67*                          |
| $\lambda$                | 23.97**                 | 10.37**            | 9.21**                         |
| $MI$                     | 3.62*                   | 18.46***           | 4.07*                          |
| $PPI$                    | 37.42***                | 0.93               | 0.31                           |
| $PPI/MI$                 | 3.91*                   | 6.50*              | 2.81                           |
| $WI$                     | 3.32*                   | 6.25*              | 3.07                           |
| $NCR$                    | 13.34***                | 0.18               | 0.80                           |

Values are  $F$ -values for repeated measures ANOVA; d.f. is degree of freedom; \*  $p < 0.05$ ; \*\*  $p < 0.01$ ; \*\*\*  $p < 0.001$ . BF, PP, FF, and OP represent bacterial feeders, plant parasites, fungal feeders, and omnivores–predators.  $H'$ , Shannon–Wiener diversity index;  $J'$ , Pielou’s evenness index;  $\lambda$ , Simpson dominance index;  $MI$ , maturity index;  $PPI$ , plant parasite index;  $PPI/MI$ , plant parasite index/maturity index;  $WI$ , Wasilewska index; and  $NCR$ , nematode channel ratio index.

**Table S3** Correlation between the seasonal variations (%) of soil communities characteristics and soil properties

| Pearson correlation  | SV (SMC) | SV (SOC) | SV (MBC) | SV (DOC) | SV (TN) | SV (MBN) | SV (DON) | SV (NO <sub>3</sub> <sup>-</sup> -N) | SV (NH <sub>4</sub> <sup>+</sup> -N) |
|----------------------|----------|----------|----------|----------|---------|----------|----------|--------------------------------------|--------------------------------------|
| SV (TNA)             | -0.152   | -0.013   | 0.247    | -0.050   | -0.030  | -0.114   | 0.054    | 0.083                                | 0.163                                |
| SV (PP)              | -0.045   | 0.264    | -0.181   | -0.376   | 0.311   | -0.506   | 0.133    | 0.532                                | -0.540                               |
| SV (BF)              | -0.256   | -0.291   | 0.424    | -0.260   | -0.291  | -0.125   | 0.279    | 0.070                                | -0.137                               |
| SV (FF)              | 0.058    | -0.322   | 0.442    | 0.294    | -0.268  | 0.326    | -0.045   | -0.502                               | 0.493                                |
| SV (OP)              | -0.035   | 0.373    | 0.019    | -0.053   | 0.235   | -0.054   | -0.060   | 0.295                                | 0.513                                |
| SV ( <i>H'</i> )     | 0.091    | 0.753*   | -0.670*  | -0.330   | 0.691*  | -0.611   | -0.164   | 0.793*                               | -0.091                               |
| SV ( <i>J'</i> )     | -0.276   | 0.444    | -0.512   | -0.410   | 0.350   | -0.750*  | -0.419   | 0.772*                               | -0.044                               |
| SV ( $\lambda$ )     | 0.143    | -0.498   | 0.335    | 0.346    | -0.405  | 0.630    | 0.456    | -0.668*                              | 0.125                                |
| SV ( <i>MI</i> )     | 0.004    | -0.296   | 0.495    | 0.322    | -0.369  | 0.496    | -0.265   | -0.540                               | 0.771*                               |
| SV ( <i>PPI</i> )    | 0.124    | -0.219   | 0.352    | -0.343   | -0.201  | 0.014    | -0.302   | -0.024                               | 0.179                                |
| SV ( <i>PPI/MI</i> ) | 0.085    | 0.220    | -0.368   | -0.575   | 0.316   | -0.556   | 0.136    | 0.609                                | -0.784*                              |
| SV ( <i>WI</i> )     | -0.083   | -0.395   | 0.262    | 0.278    | -0.430  | 0.395    | -0.168   | -0.488                               | 0.711*                               |
| SV ( <i>NCR</i> )    | -0.111   | 0.128    | -0.074   | -0.395   | 0.113   | -0.306   | 0.556    | 0.454                                | -0.563                               |

SV: the seasonal variability (%), indicated by Difference value (Rainy season – Dry season)/Average (Two seasons)  $\times$  100%. TNA, total nematode abundance. BF, PP, FF, and OP represent the abundance of bacterial feeders, plant parasites, fungal feeders, and omnivores–predators. *H'*, Shannon–Wiener diversity index; *J'*, Pielou’s evenness index;  $\lambda$ , Simpson dominance index; *MI*, maturity index; *PPI*, plant parasite index; *PPI/MI*, plant parasite index/maturity index; *WI*, Wasilewska index; and *NCR*, nematode channel ratio index. SMC, soil moisture content; SOC, soil organic carbon; MBC, soil microbial biomass carbon; DOC, soil dissolved organic carbon; TN, soil total nitrogen; MBN, soil microbial biomass nitrogen; DON, soil dissolved organic nitrogen; NO<sub>3</sub><sup>-</sup>-N, soil nitrate nitrogen; and NH<sub>4</sub><sup>+</sup>-N, soil ammonium nitrogen.
